# Supplementary material for: Gas Chromatography–Mass Spectrometry-Based Metabolite Profiling for the Assessment of Freshness in Gilthead Sea Bream (Sparus aurata)
Source: MDPI journal article supplement (doi:10.3390/foods9040464), 2020-04-09
Supplement: s1 [file s1]

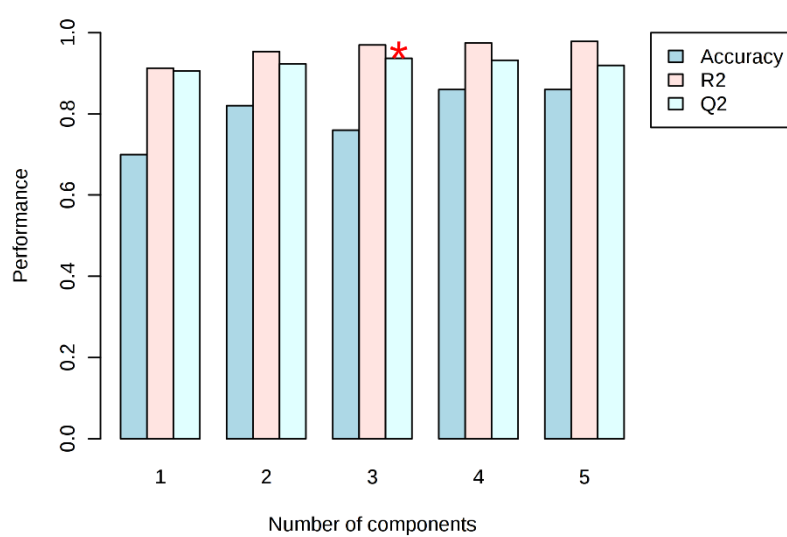

**Figure S2:** PLS-DA classification using different number of components. The red star indicates the best classifier based on Q2.
