# Supplementary material for: Gas Chromatography–Mass Spectrometry-Based Metabolite Profiling for the Assessment of Freshness in Gilthead Sea Bream (Sparus aurata)
Source: MDPI journal article supplement (doi:10.3390/foods9040464), 2020-04-09

**Table S2:** Most significant metabolites with a decreasing trend during storage of sea bream on ice. The y-axis represents the relative amount before and after variable transformation, respectively for the bar plot and the box plot. The x-axis shows sampling sequence which is equivalent to storage time.

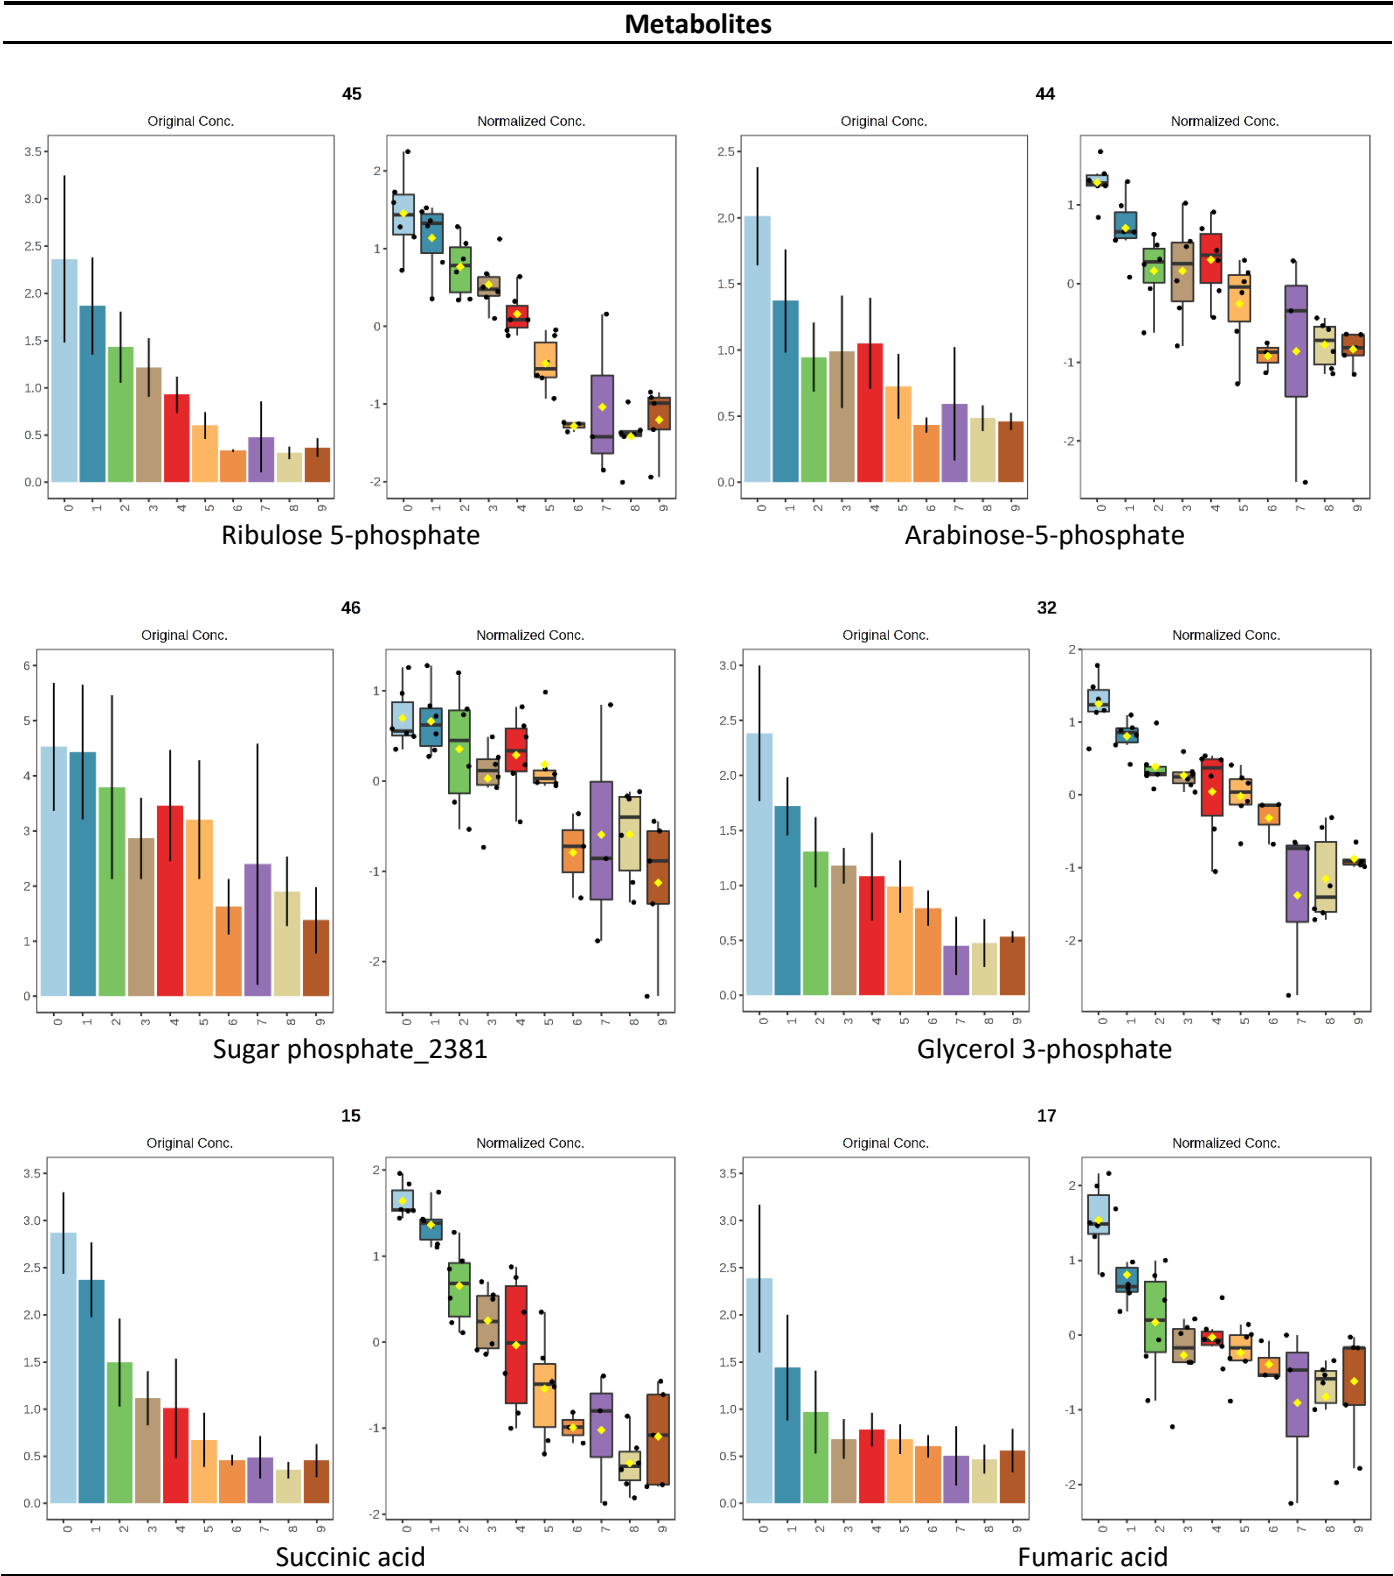

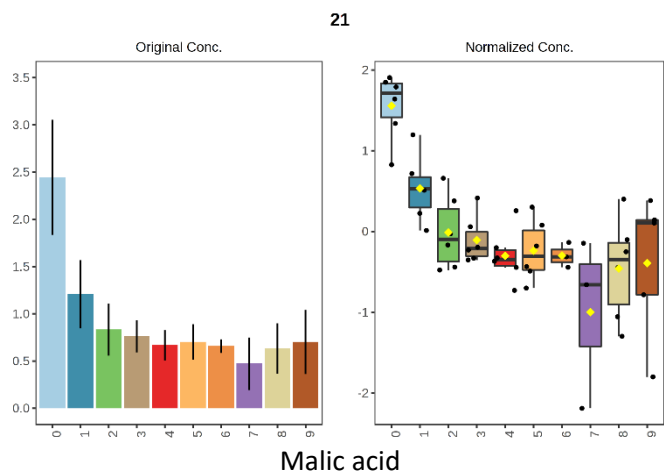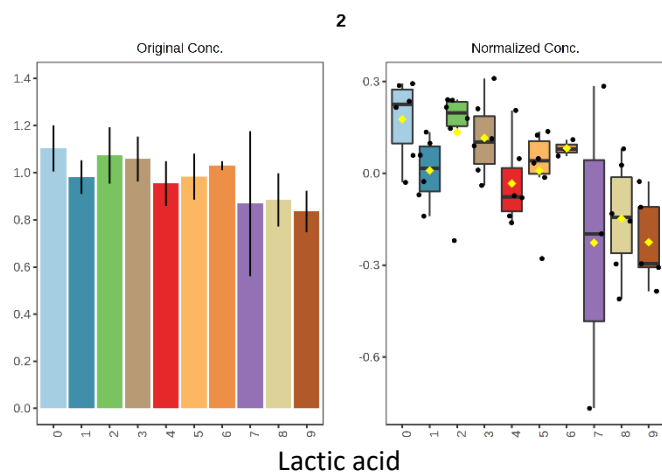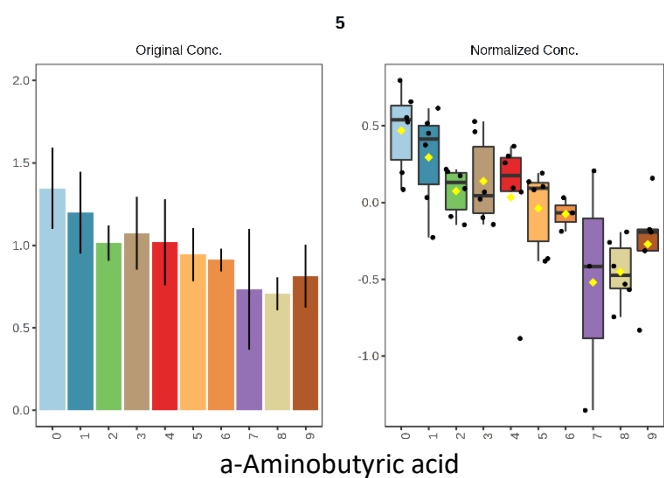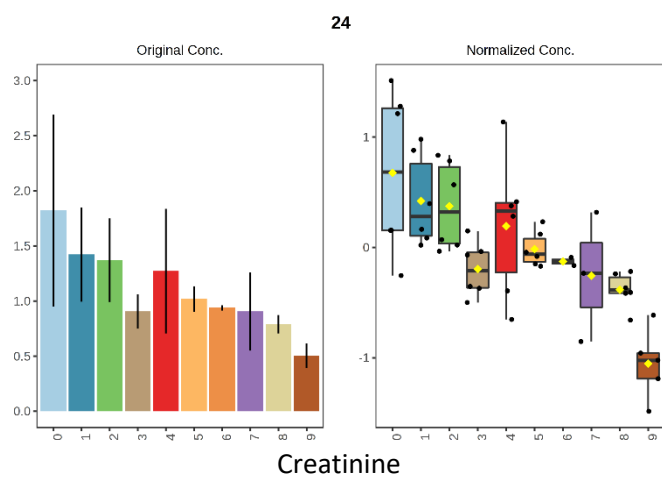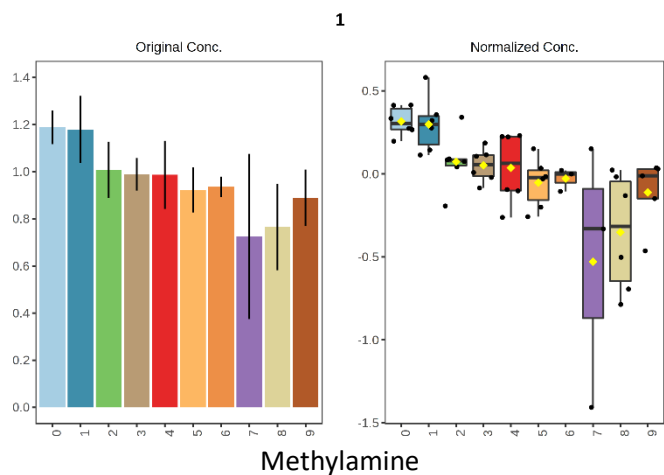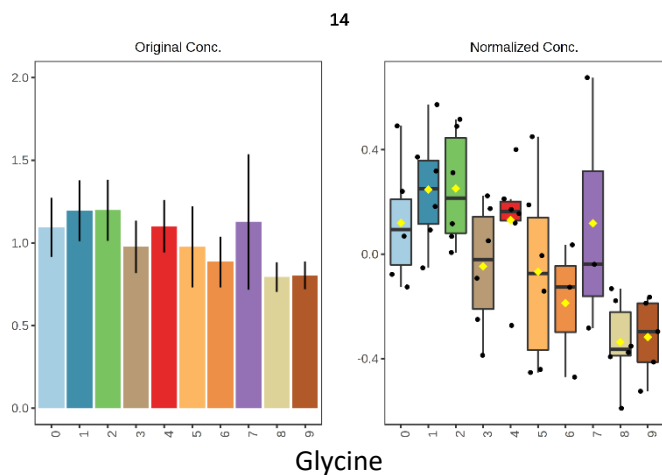

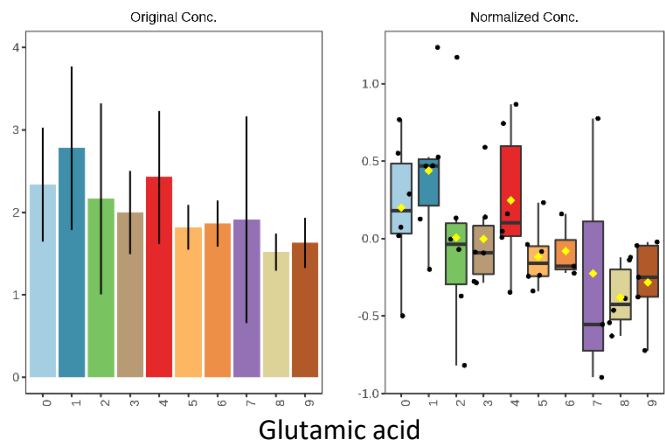

Supplement: s1 [file s1]
