# Supplementary material for: Gas Chromatography–Mass Spectrometry-Based Metabolite Profiling for the Assessment of Freshness in Gilthead Sea Bream (Sparus aurata)
Source: MDPI journal article supplement (doi:10.3390/foods9040464), 2020-04-09
Supplement: s1 [file s1]

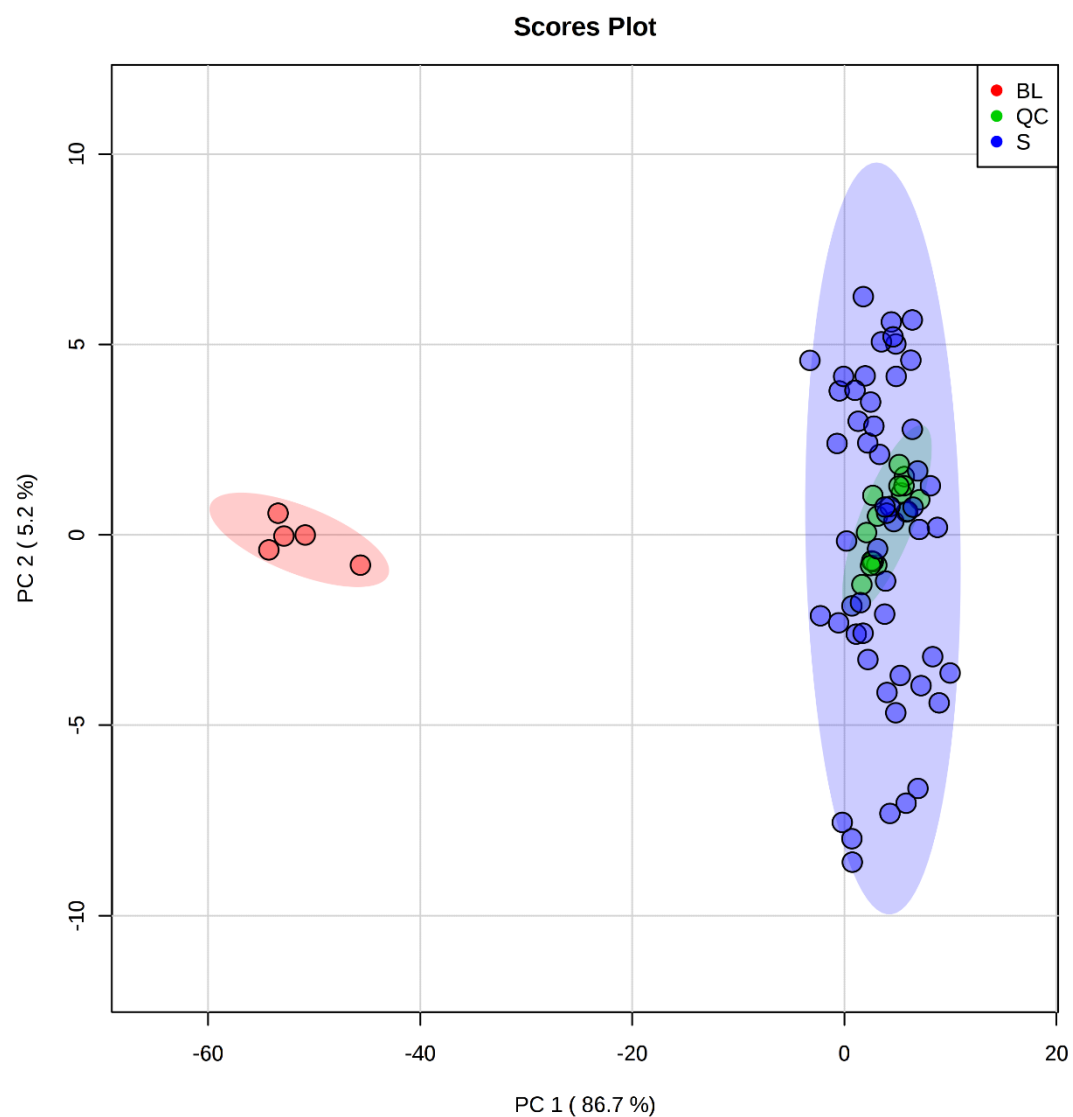

**Figure S1:** PCA score plot for the entire data set before data curation. The legend indicates the type of samples (BL-blank, QC-quality control, S-sample).
